# Supplementary material for: Corundum-bearing and spinel-bearing symplectites in ultrahigh-pressure eclogites record high-temperature overprint and partial melting during slab exhumation
Source: Copernicus journal article supplement (doi:10.5194/ejm-35-569-2023), 2023-08-01
Supplement: Supplementary file 1 [file ejm-35-569-2023-supplement.zip]

Archive with 2 entries (2 files):
- Tables S1-S5.xlsx
- ejm-35-569-2023-supplement-title-page.pdf
