# Supplementary material for: Corundum-bearing and spinel-bearing symplectites in ultrahigh-pressure eclogites record high-temperature overprint and partial melting during slab exhumation
Source: Copernicus journal article supplement (doi:10.5194/ejm-35-569-2023), 2023-08-01
Supplement: Supplementary file 1 [file ejm-35-569-2023-supplement.zip › ejm-35-569-2023-supplement-title-page.pdf]

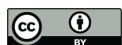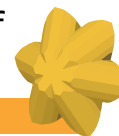

*Supplement of*

**Corundum-bearing and spinel-bearing symplectites in ultrahigh-pressure eclogites record high-temperature overprint and partial melting during slab exhumation**

**Pan Tang and Shun Guo**

*Correspondence to:* Shun Guo ([guoshun@mail.iggcas.ac.cn](mailto:guoshun@mail.iggcas.ac.cn))

- [ejm-35-569-2023-supplement-title-page.pdf](#)
- [Tables S1-S5.xlsx](#)

The copyright of individual parts of the supplement might differ from the article licence.
