# Supplementary material for: Corundum-bearing and spinel-bearing symplectites in ultrahigh-pressure eclogites record high-temperature overprint and partial melting during slab exhumation
Source: Copernicus journal article supplement (doi:10.5194/ejm-35-569-2023), 2023-08-01
Supplement: Supplementary file 1 [file ejm-35-569-2023-supplement.zip › Tables S1-S5.xlsx]

## Sheet: Table S1
Table S1 The representative major element compositions of phengite, paragonite and biotite in Yanwo eclogites (oxide concentrations in wt%).
Mineral		Ph porphyroblast				Pg porphyroblast				Bt in CPB symplectite				Bt in SPB symplectite
SiO2		52.526	49.748	49.5		46.613	47.118	46.685		34.969	35.171	34.937		34.818	34.947	34.845
TiO2		0.368	0.178	0.412		0.055	0.065	0.083		0.573	2.781	1.75		3.684	3.389	0.613
Al2O3		29.177	30.632	28.525		39.027	38.425	38.821		22.127	18.784	21.963		19.391	17.852	21.591
Cr2O3		0.028	0.04	0.009		0.032	0	0.024		0.044	0.056	0		0.087	0.168	0.095
FeO		1.242	0.525	2.593		0.522	0.691	0.515		12.496	15.179	13.371		14.213	14.716	13.255
MnO		0	0	0		0	0	0.021		0.057	0.061	0		0.015	0.04	0.039
MgO		3.046	2.383	2.75		0.172	0.211	0.213		13.511	13.183	12.837		12.87	12.936	14.543
CaO		0.127	0.003	0.028		0.798	0.403	0.295		0.126	0.175	0.11		0.102	0.118	0.056
Na2O		0.654	0.368	0.853		6.658	7.002	7.25		0.369	0.595	0.324		0.366	0.21	0.359
K2O		9.791	10.401	9.803		0.69	0.867	0.612		9.326	9.473	9.773		9.424	9.266	9.304
NiO		0.005	0.01	0		0	0.057	0		0.006	0	0.002		0.019	0.001	0.007
Total		96.964	94.288	94.473		94.567	94.839	94.519		93.604	95.458	95.067		94.989	93.643	94.707
O		11	11	11		11	11	11		11	11	11		11	11	11
Si		3.44625	3.3484	3.33514		3.02086	3.03972	3.01363		2.33335	2.33872	2.31431		2.33335	2.38315	2.29552
Ti		0.0181615	0.00901184	0.0208804		0.00268113	0.00315422	0.00403016		0.0287596	0.1391	0.0871977		0.185706	0.173838	0.0303761
Al		2.25615	2.42992	2.26511		2.98087	2.92156	2.95348		1.7401	1.4721	1.71467		1.53155	1.43477	1.67636
Cr		0.00145247	0.00212862	0.000479433		0.00163964	0	0.0012249		0.00232128	0.00294414	0		0.00460969	0.00905789	0.00494812
Fe2+		0.0681476	0.0295514	0.146106		0.0282911	0.0372805	0.027802		0.697308	0.844097	0.740722		0.796559	0.839242	0.730257
Mn		0	0	0		0	0	0.0011482		0.0032215	0.00343565	0		0.000851438	0.0023104	0.00217616
Mg		0.297929	0.239109	0.276218		0.0166174	0.0202927	0.0204976		1.34399	1.30683	1.26768		1.28578	1.31508	1.42825
Ca		0.00892792	0.00021635	0.00202135		0.0554115	0.0278565	0.0204037		0.00900828	0.0124682	0.00780732		0.00732403	0.00862179	0.00395278
Na		0.0831945	0.0480235	0.11143		0.836587	0.875817	0.907391		0.0477384	0.0767104	0.0416126		0.0475555	0.0277655	0.0458542
K		0.819522	0.893096	0.842614		0.057047	0.0713554	0.0503993		0.793878	0.803603	0.825894		0.805698	0.80611	0.781935
Ni		0.000263903	0.000541457	0		0	0.00295818	0		0.00032207	0	0.000106578		0.00102431	5.48584e-05	0.000370971
Total		7	7	7		7	7	7		7	7	7		7	7	7
XMg		0.813844	0.890005	0.654043		0.370027	0.352468	0.424384		0.658399	0.607565	0.631188		0.617468	0.610438	0.661684
		XMg = Mg/(Mg + Fe2+ ).
		Mineral abbreviations are after Whitney and Evans (2010).

## Sheet: Table S2
Table S2 The representative major element compositions of garnet in Yanwo eclogites (oxide concentrations in wt%).
Mineral		Grt matrix
SiO2		39.284	39.217	38.829	38.843	38.9	38.575	39.089	39.137	38.942	38.726	38.777	38.616	38.935	38.882	39.069	38.904	39.096	38.875	39.09	38.608	38.966	38.647	38.409	38.826	38.942	38.655	38.631	38.464	38.87	38.411
TiO2		0.058	0.033	0.088	0.025	0	0	0.03	0	0.007	0.049	0	0.001	0.026	0.003	0	0.034	0.028	0.015	0	0.026	0.037	0.021	0.029	0.03	0.093	0.062	0	0.052	0.01	0.035
Al2O3		21.795	21.561	21.56	21.541	21.656	21.791	21.691	21.646	21.604	21.479	21.446	21.538	21.477	21.757	21.455	21.514	21.428	21.703	21.637	21.636	21.632	21.507	21.489	21.457	21.501	21.34	21.202	21.134	21.274	21.059
Cr2O3		0.059	0.021	0.051	0.025	0	0.055	0.022	0.003	0.036	0.003	0.033	0.049	0.028	0.003	0	0.017	0.042	0.012	0.06	0.01	0.003	0	0	0.029	0.016	0	0	0	0.026	0.059
FeO		21.929	21.952	22.187	22.471	22.534	22.359	22.741	22.887	23.187	22.893	22.999	23.19	23.829	23.756	23.705	23.859	23.181	23.46	23.605	23.154	23.561	23.633	24.189	23.648	23.137	22.918	22.369	22.37	22.298	22.319
MnO		0.4	0.379	0.445	0.474	0.421	0.39	0.435	0.429	0.434	0.437	0.495	0.489	0.437	0.466	0.443	0.465	0.432	0.503	0.463	0.415	0.448	0.438	0.4	0.492	0.426	0.376	0.426	0.447	0.431	0.407
MgO		7.881	7.911	7.902	7.945	7.928	8.138	8.177	8.016	7.835	8.003	7.674	7.653	8.251	8.404	8.589	8.561	8.573	8.898	9.005	8.946	9.039	8.887	8.594	7.671	7.325	7.629	7.948	7.875	7.79	7.679
CaO		8.815	8.885	8.825	8.692	8.441	8.36	7.949	8.05	7.801	8.012	7.971	8.039	7.115	6.949	6.569	6.394	6.539	6.251	6.365	6.109	6.138	6.165	6.085	7.634	8.713	8.361	8.09	8.292	8.285	8.471
Na2O		0.064	0.062	0	0.029	0.08	0.034	0.063	0.01	0.031	0.036	0.039	0.033	0.019	0.007	0.005	0.057	0	0.036	0.027	0.066	0.094	0.01	0.019	0.079	0.098	0.031	0.09	0.01	0.042	0.08
K2O		0.074	0.035	0.022	0.054	0.004	0	0	0.024	0.007	0.006	0.02	0.006	0	0	0	0.007	0	0	0	0.032	0.023	0	0	0.015	0.012	0.002	0.026	0	0	0
NiO		0	0	0.029	0	0	0	0	0	0	0	0	0	0.003	0.014	0.004	0.038	0	0	0	0	0.004	0	0	0	0	0	0	0.041	0	0
Total		100.359	100.056	99.938	100.099	99.964	99.702	100.197	100.202	99.884	99.644	99.454	99.614	100.12	100.241	99.839	99.85	99.319	99.753	100.252	99.002	99.945	99.308	99.214	99.881	100.263	99.374	98.782	98.685	99.026	98.52
O		12	12	12	12	12	12	12	12	12	12	12	12	12	12	12	12	12	12	12	12	12	12	12	12	12	12	12	12	12	12
Si		2.98877	2.99289	2.97073	2.96667	2.97378	2.95354	2.98079	2.98814	2.98681	2.97356	2.9882	2.97214	2.97925	2.9684	2.9935	2.98089	3.00903	2.9746	2.97637	2.97269	2.97335	2.97231	2.96328	2.98258	2.98018	2.98117	2.98854	2.98246	3.00285	2.9836
Ti		0.00331922	0.00189436	0.00506432	0.00143624	0	0	0.0017208	0	0.00040385	0.0028301	0	5.78941e-05	0.00149648	0.000172277	0	0.00195958	0.001621	0.000863338	0	0.00150583	0.0021237	0.00121487	0.00168294	0.00173349	0.00535352	0.0035967	0	0.00303287	0.000581099	0.00204496
Al		1.95428	1.93928	1.94406	1.93899	1.95116	1.96639	1.94945	1.94781	1.95289	1.94376	1.94777	1.95372	1.93684	1.95762	1.93745	1.9428	1.94371	1.95719	1.94166	1.96338	1.94541	1.94946	1.95394	1.94264	1.93927	1.93968	1.9331	1.93133	1.93697	1.92787
Cr		0.00354899	0.00126711	0.00308499	0.00150964	0	0.00332948	0.00132641	0.000181097	0.00218308	0.000182126	0.0020106	0.00298178	0.00169395	0.000181081	0	0.00102986	0.00255576	0.000725965	0.00361202	0.000608763	0.000180991	0	0	0.00176134	0.000968103	0	0	0	0.00158807	0.00362338
Fe3+		0.074618	0.0824585	0.103407	0.132849	0.113518	0.128249	0.0935092	0.0795383	0.0757815	0.109225	0.0816134	0.104408	0.102791	0.106095	0.076289	0.0996177	0.0324387	0.0965056	0.105963	0.100627	0.11961	0.104979	0.118977	0.100212	0.1044	0.0956118	0.105893	0.0992	0.0608815	0.109264
Fe2+		1.32063	1.31857	1.31618	1.30242	1.32712	1.30343	1.35674	1.38183	1.41149	1.36083	1.40057	1.38825	1.42206	1.41062	1.44266	1.42922	1.45961	1.40471	1.39712	1.39029	1.38391	1.41506	1.4417	1.41901	1.37637	1.38252	1.3413	1.35138	1.37971	1.34056
Mn		0.0257764	0.0244986	0.0288372	0.0306634	0.0272601	0.0252923	0.0280965	0.0277433	0.0281946	0.0284211	0.0323093	0.0318785	0.0283227	0.0301332	0.0287499	0.030178	0.028162	0.0325996	0.0298599	0.0270649	0.028955	0.0285324	0.0261388	0.0320125	0.0276134	0.0245615	0.0279138	0.0293571	0.0282021	0.0267772
Mg		0.893857	0.900034	0.90127	0.904608	0.903513	0.928892	0.92957	0.912394	0.895859	0.916089	0.881593	0.878102	0.941204	0.956468	0.981071	0.977884	0.983643	1.01499	1.02215	1.02686	1.02823	1.01893	0.98843	0.87848	0.835686	0.877121	0.916624	0.910292	0.897153	0.889202
Ca		0.718576	0.726521	0.723429	0.711295	0.691398	0.685831	0.649477	0.658543	0.641083	0.659157	0.658146	0.662947	0.583332	0.568421	0.539288	0.524927	0.539237	0.512485	0.519271	0.503983	0.501835	0.508026	0.503007	0.628341	0.714441	0.690898	0.670572	0.688895	0.68578	0.705008
Na		0.00944062	0.00917388	0	0.00429436	0.0118575	0.00504731	0.00931456	0.00148033	0.00460995	0.00535946	0.00582699	0.00492448	0.0028188	0.00103613	0.000742782	0.00846781	0	0.00534078	0.00398593	0.00985281	0.013907	0.00149116	0.00284209	0.0117663	0.014541	0.0046354	0.0134992	0.00150336	0.00629089	0.0120481
K		0.00718239	0.00340758	0.00214729	0.00526151	0.000390104	0	0	0.00233769	0.000684934	0.000587741	0.0019662	0.000589135	0	0	0	0.000684244	0	0	0	0.00314328	0.00223897	0	0	0.00147001	0.00117157	0.000196776	0.002566	0	0	0
Ni		0	0	0.00178487	0	0	0	0	0	0	0	0	0	0.000184667	0.000859813	0.000246553	0.00234228	0	0	0	0	0.00024554	0	0	0	0	0	0	0.00255744	0	0
Total		8	8	8	8	8	8	8	8	8	8	8	8	8	8	8	8	8	8	8	8	8	8	8	8	8	8	8	8	8	8
Grs		24.2857	24.4651	24.3602	24.1199	23.4429	23.3003	21.913	22.095	21.5372	22.2351	22.1403	22.388	19.6083	19.1669	18.0257	17.7208	17.911	17.2858	17.4933	17.0946	17.0522	17.1021	16.9976	21.2432	24.1846	23.2226	22.682	23.1179	22.9293	23.8054
Prp		30.2097	30.308	30.3487	30.6752	30.6349	31.558	31.3632	30.612	30.0964	30.902	29.6572	29.6538	31.6379	32.2517	32.7923	33.012	32.6721	34.2349	34.4345	34.8301	34.939	34.3011	33.401	29.7001	28.2889	29.482	31.0047	30.5475	29.9966	30.0249
Alm		44.6334	44.4019	44.3201	44.1651	44.9979	44.2824	45.7758	46.3622	47.4191	45.9042	47.1156	46.8816	47.8017	47.5654	48.221	48.2484	48.4815	47.3798	47.0663	47.1573	47.0249	47.6363	48.7181	47.9744	46.5917	46.4698	45.3692	45.3495	46.1311	45.2656
Sps		0.871166	0.824974	0.971043	1.03979	0.924295	0.859274	0.947963	0.930823	0.947199	0.958718	1.0869	1.07655	0.952047	1.01608	0.960968	1.01877	0.935413	1.09956	1.00593	0.918013	0.983883	0.960512	0.883283	1.0823	0.934746	0.825568	0.944179	0.985162	0.942948	0.904163
Total		100	100	100	100	100	100	100	100	100	100	100	100	100	100	100	100	100	100	100	100	100	100	100	100	100	100	100	100	100	100
		Grs = Ca/(Fe2++ Mg + Ca + Mn), Prp = Mg/(Fe2++ Mg + Ca + Mn), Alm = Fe2+/(Fe2++ Mg + Ca + Mn), Sps = Mn/(Fe2++ Mg + Ca + Mn)

## Sheet: Table S3
Table S3 The representative major element compositions of clinopyroxene and orthopyroxene in Yanwo eclogites (oxide concentrations in wt%).
Mineral		Omp matrix																															Di in symplectite							Opx in symplectite
SiO2		55.81	56.297	56.238	56.166	55.623	56.389	56.118	56.577	55.564	56.345	56.618	55.521	55.826	56.68	56.16	55.415	56.097	55.395	55.582	56.06	55.838	56.394	55.552	55.709	56.456	56.256	56.502	55.367	55.895	56.08		53.416	53.366	53.299	53.44	53.266		SiO2	54.676	55.215	54.319	53.01	54.41
TiO2		0.026	0.043	0.068	0.102	0.07	0.085	0.044	0.077	0.023	0.106	0.055	0	0.1	0.024	0.007	0.041	0.051	0.062	0.056	0.05	0.059	0.012	0.046	0.067	0.075	0.052	0.053	0.057	0.057	0.059		0.058	0.046	0.024	0.02	0.046		TiO2	0	0.006	0	0	0.02
Al2O3		11.038	11.275	11.311	11.448	11.284	11.383	11.174	11.139	11.233	11.142	11.232	11.122	10.981	10.915	10.856	10.791	10.386	10.539	10.789	10.702	10.359	10.557	10.761	10.635	10.313	10.401	11.132	10.397	10.605	10.336		1.04	1.16	1.296	1.63	1.16		Al2O3	0.283	0.741	0.464	1.32	1.3
Cr2O3		0.016	0.046	0.025	0.029	0	0.006	0.029	0.004	0.036	0.019	0.027	0	0.027	0.014	0.038	0.007	0	0.012	0	0	0.037	0	0.041	0.051	0.046	0	0	0.002	0.036	0		0.14	0.199	0.04	0.01	0.199		Cr2O3	0.023	0	0	0.03	0.04
FeO		4.35	4.202	4.098	4.234	4.447	4.592	4.527	4.508	4.442	4.634	4.522	5.002	4.96	5.23	5.315	5.421	6.092	5.542	5.422	5.66	5.772	5.895	5.893	5.967	5.983	6.175	4.605	6.071	5.415	6.003		10.911	10.785	10.891	9.99	10.785		FeO	20.594	19.766	20.473	19.58	19.15
MnO		0	0.021	0.014	0	0	0.013	0.015	0.001	0	0.004	0	0.01	0.012	0	0.018	0	0.006	0.052	0.004	0.011	0.009	0.014	0	0.015	0.005	0.018	0	0.023	0.002	0		0.18	0.194	0.17	0.05	0.194		MnO	0.129	0.121	0.123	0.15	0.14
MgO		8.444	8.112	8.327	8.276	8.309	8.043	8.241	8.128	8.234	8.24	7.997	8.121	8.119	7.974	8.167	8.186	7.927	8.142	7.887	7.859	8.131	8.022	7.989	7.926	7.834	7.947	8.187	7.993	8.071	8.12		12.154	12.275	12.324	12.3	12.275		MgO	23.504	22.842	23.181	24.87	24.17
CaO		12.561	12.709	12.485	12.422	12.562	12.255	12.374	12.439	12.489	12.354	12.227	12.389	12.217	12.059	12.322	12.197	11.909	12.355	12.231	12.169	11.894	11.964	12.029	12.165	12.066	12.096	12.483	12.202	12.353	12.165		21.182	20.936	20.931	20.5	20.936		CaO	0.237	0.256	1.158	0.19	0.26
Na2O		7.301	7.51	7.562	7.547	7.436	7.683	7.536	7.571	7.487	7.564	7.711	7.498	7.549	7.801	7.732	7.533	7.603	7.551	7.615	7.716	7.713	7.762	7.555	7.694	7.773	7.834	7.796	7.698	7.789	7.959		0.927	1.01	0.872	1.56	1.11		Na2O	0.084	0.104	0.208	0.99	0.58
K2O		0	0	0.041	0	0	0.002	0.008	0.011	0.014	0	0.028	0.015	0.018	0	0.007	0	0.028	0.015	0.001	0.007	0	0.009	0	0.019	0	0.003	0	0.005	0.022	0.009		0.186	0.04	0.036	0.01	0.04		K2O	0.011	0.022	0.006	0.02	0.03
NiO		0.012	0.028	0.036	0.051	0.002	0.03	0	0.019	0.015	0	0.012	0	0.041	0	0.024	0.022	0	0.024	0.024	0	0.009	0.04	0.015	0	0.004	0	0.013	0	0.002	0.011		0.02	0.014	0.019	0	0.014		NiO	0.07	0.044	0.008	0	0
Total		99.558	100.243	100.205	100.275	99.733	100.481	100.066	100.474	99.537	100.408	100.429	99.678	99.85	100.697	100.646	99.613	100.099	99.689	99.611	100.234	99.821	100.669	99.881	100.248	100.555	100.782	100.771	99.815	100.247	100.742		100.214	100.025	99.902	99.51	100.025		Total	99.611	99.117	99.94	100.16	100.1
O		6	6	6	6	6	6	6	6	6	6	6	6	6	6	6	6	6	6	6	6	6	6	6	6	6	6	6	6	6	6		6	6	6	6	6		O	6	6	6	6	6
Si		1.98082	1.98439	1.98	1.97734	1.96967	1.98259	1.9811	1.99057	1.97095	1.98335	1.99152	1.96956	1.97774	1.99087	1.97317	1.9686	1.98873	1.96776	1.97581	1.98132	1.98039	1.98469	1.97188	1.96976	1.99154	1.97853	1.97873	1.96541	1.9717	1.96915		1.99801	1.9976	1.99848	1.99553	1.99214		Si	2.02736	2.05819	2.00628	1.92228	1.986
Ti		0.000694125	0.0011401	0.00180084	0.00270109	0.00186453	0.00224796	0.00116839	0.00203779	0.000613679	0.0028066	0.0014552	0	0.0026648	0.000634096	0.000184998	0.00109558	0.00136	0.00165663	0.00149737	0.00132924	0.001574	0.000317668	0.00122821	0.00178195	0.00199008	0.00137565	0.00139615	0.00152198	0.00151243	0.00155831		0.00163187	0.00129519	0.0006769	0.000561763	0.00129385		Ti	0	0.000168203	0	0	0.000549018
Al		0.461719	0.468397	0.469343	0.474998	0.470931	0.471683	0.464908	0.461889	0.469605	0.462233	0.46563	0.464997	0.45849	0.451846	0.449535	0.4518	0.433949	0.441221	0.452009	0.445781	0.433005	0.437881	0.450183	0.44318	0.428763	0.431125	0.459464	0.434975	0.440894	0.427738		0.0458474	0.0511747	0.0572719	0.0717354	0.0511464		Al	0.0123711	0.0325637	0.0202044	0.0564313	0.0559413
Cr		0.000448982	0.00128197	0.000695907	0.000807201	0	0.000166789	0.000809428	0.000111269	0.00100963	0.000528778	0.000750879	0	0.000756265	0.000388792	0.0010556	0.00019661	0	0.000337023	0	0	0.00103752	0	0.00115065	0.00142572	0.00128296	0	0	5.61318e-05	0.00100403	0		0.0041403	0.00588942	0.00118582	0.000295235	0.00588375		Cr	0.000674207	0	0	0.000860025	0.00115423
Fe3+		0.0772188	0.0725007	0.0844037	0.0792606	0.0965286	0.082303	0.0859215	0.0697387	0.101805	0.0811589	0.0748074	0.112264	0.0992712	0.0960224	0.129718	0.127465	0.109733	0.140345	0.118261	0.117968	0.132418	0.122137	0.122392	0.140621	0.114534	0.143397	0.10962	0.161147	0.145375	0.173094		0.0268289	0.0203661	0.00833656	0.049211	0.0384359		Fe3+	0	0	0	0.166361	0.0122605
Fe2+		0.0518966	0.0513661	0.0362562	0.0453957	0.0351644	0.0527165	0.0477289	0.0629021	0.0299652	0.0552539	0.0582124	0.0361289	0.0476794	0.0576055	0.0264523	0.0335864	0.0708815	0.0242907	0.0429242	0.0493243	0.0387817	0.0513635	0.0525417	0.0358208	0.06197	0.0382241	0.0252479	0.0190792	0.0143689	0.00318271		0.31448	0.317247	0.333175	0.262759	0.29999		Fe2+	0.635391	0.609059	0.631482	0.435917	0.57292
Mn		0	0.000626972	0.000417493	0	0	0.00038714	0.000448519	2.98005e-05	0	0.000119258	0	0.000300468	0.000360082	0	0.00053567	0	0.000180166	0.00156456	0.000120436	0.000329292	0.000270364	0.000417325	0	0.000449226	0.000149394	0.000536207	0	0.000691538	5.97564e-05	0		0.00570276	0.00615079	0.00539904	0.00158142	0.00614586		Mn	0.00405168	0.00382054	0.00384818	0.00460745	0.00432853
Mg		0.446778	0.426267	0.437053	0.434348	0.438631	0.421568	0.433705	0.426316	0.435415	0.432395	0.419341	0.42947	0.428792	0.417541	0.427771	0.433523	0.418944	0.431165	0.417959	0.414076	0.429907	0.420876	0.422751	0.417785	0.411976	0.416665	0.427424	0.422983	0.424431	0.425047		0.67773	0.684975	0.688881	0.684711	0.684184		Mg	1.29885	1.26895	1.27601	1.34405	1.3148
Ca		0.477673	0.479985	0.470974	0.468568	0.47662	0.461664	0.468045	0.468918	0.474661	0.465934	0.460812	0.470894	0.463738	0.453835	0.463867	0.464255	0.452361	0.470239	0.465851	0.46082	0.451983	0.45114	0.457494	0.460866	0.456053	0.455816	0.4684	0.464095	0.466891	0.457674		0.848922	0.839674	0.840902	0.820199	0.838991		Ca	0.00941622	0.010225	0.0458292	0.00738255	0.0101688
Na		0.502411	0.513247	0.516197	0.515141	0.510532	0.523737	0.515809	0.516458	0.514913	0.516225	0.525877	0.515706	0.518522	0.53126	0.526714	0.51885	0.522595	0.520056	0.524838	0.528735	0.530381	0.529637	0.519948	0.527454	0.531632	0.534197	0.529346	0.529815	0.532715	0.541843		0.0672281	0.0733008	0.0633931	0.112943	0.0805478		Na	0.0060433	0.00752181	0.0149061	0.0696554	0.0410762
K		0	0	0.00184153	0	0	8.97076e-05	0.000360292	0.000493731	0.000633536	0	0.00125646	0.000678836	0.000813518	0	0.00031376	0	0.00126635	0.000679757	4.53494e-05	0.000315617	0	0.000404077	0	0.000857043	0	0.000134603	0	0.000226429	0.000990039	0.000403157		0.00887566	0.00191013	0.00172205	0.000476379	0.00190858		K	0.000520365	0.00104624	0.00028273	0.000925273	0.00139702
Ni		0.000342623	0.000793968	0.00101962	0.00144437	5.69733e-05	0.000848519	0	0.000537765	0.000428031	0	0.000339557	0	0.00116848	0	0.000678347	0.000628716	0	0.000685828	0.000686316	0	0.000256782	0.00113246	0.000428326	0	0.000113512	0	0.000366243	0	5.67546e-05	0.000310717		0.000601809	0.000421573	0.000573109	0	0.000421135		Ni	0.00208764	0.00131918	0.000237658	0	0
Total		4	4	4	4	4	4	4	4	4	4	4	4	4	4	4	4	4	4	4	4	4	4	4	4	4	4	4	4	4	4		4	4	4	4	4.00109		Total	3.99676	3.99286	3.99908	4.00847	4.0006
Ts		1.92314	1.55242	1.99089	2.26599	2.99169	1.74414	1.89038	0.951644	2.85637	1.67775	0.854445	2.99081	2.22728	0.920141	2.63952	3.10254	1.14447	3.16213	2.39057	1.85686	1.96571	1.53696	2.80621	2.98096	0.854201	2.12824	2.09259	3.37264	2.76099	3.00211		0.21621	0.264617	0.167562	0.47752	0.857801		Wo	0.00468402	0.00501837	0.023238	0.00415521	0.00535924
Aeg		7.74178	7.21202	8.40073	7.92477	9.52192	8.24483	8.5924	7.0364	10.0101	8.17581	7.53524	11.031	9.93464	9.67412	12.7638	12.5939	11.143	13.7652	11.6867	11.7277	13.2711	12.2646	12.2154	13.8621	11.5587	14.2137	10.7871	15.7121	14.1848	16.8436		2.91742	2.24096	0.921173	5.25381	4.19115		En	0.64632	0.623006	0.647227	0.756747	0.693173
Jd		42.4446	43.489	42.7321	42.9601	40.4709	43.7632	42.7114	44.6998	40.4618	43.209	45.1934	39.7086	41.4292	43.6826	38.9537	38.4339	41.777	36.9511	39.8868	40.6033	39.4649	40.8966	39.3182	37.7258	41.5623	38.4771	41.0279	35.6654	37.4978	35.6185		4.55311	5.10173	5.9933	6.7035	3.83741		Fs	0.348996	0.371976	0.329535	0.239098	0.301467
Hd		5.20304	5.10964	3.60859	4.53883	3.46874	5.28095	4.77303	6.34661	2.94637	5.56619	5.86365	3.54999	4.77156	5.80367	2.60282	3.31842	7.19774	2.38246	4.24182	4.90354	3.88676	5.15775	5.24394	3.53114	6.254	3.78881	2.48449	1.86025	1.40203	0.309706		34.1971	34.908	36.8152	28.0524	32.4435		XMg	0.671503	0.675689	0.668946	0.755099	0.696502
Di		42.6874	42.6369	43.2677	42.3103	43.5467	40.9669	42.0328	40.9656	43.7254	41.3712	40.5533	42.7196	41.6373	39.9195	43.0402	42.5512	38.7378	43.7391	41.7941	40.9086	41.4116	40.1442	40.4163	41.9	39.7708	41.3921	43.6079	43.3896	44.1544	44.2261		58.1162	57.4847	56.1028	59.5128	58.6701
Total		100	100	100	100	100	100	100	100	100	100	100	100	100	100	100	100	100	100	100	100	100	100	100	100	100	100	100	100	100	100		100	100	100	100	100
		Ts = Tschermak molecule; Aeg = aegirine; Jd = jadeite; Hd = hedenbergite; Di = diopside
		Wo = wollastonite; En = enstatite; Fs = ferrosilite
		XMg = Mg/(Mg + Fe2+ ).

## Sheet: Table S4
Table S4 The representative major element compositions of ampholite in Yanwo eclogites (oxide concentrations in wt.%).
Mineral		Amp matrix						Amp in symplectite after Pg
SiO2		49.953	48.169	47.841	48.359	48.602		40.855	41.772	45.29	45.552	46.699
TiO2		0.142	0.216	0.294	0.239	0.279		0.231	0.237	0.414	0.4	0.42
Al2O3		11.405	12.041	12.536	12.701	12.137		18.984	19.111	17.68	17.641	18.305
Cr2O3		0.035	0	0.046	0.048	0.014		0.023	0.018	0.044	0.008	0.038
FeO		9.45	9.055	10.054	9.817	10.303		7.341	7.487	7.211	7.268	6.842
MnO		0.036	0.034	0.031	0	0.043		0	0.039	0.042	0.05	0.031
MgO		14.905	14.543	13.613	13.074	13.645		12.493	12.453	12.264	12.528	11.643
CaO		7.344	7.08	7.809	8.198	8.147		10.658	10.554	9.171	9.153	9.017
Na2O		4.586	4.931	4.309	4.33	4.378		3.533	3.598	4.493	4.625	4.596
K2O		0.31	0.464	0.535	0.347	0.378		0.921	1.036	0.722	0.76	0.773
NiO		0.022	0	0.037	0.013	0		0	0.011	0.001	0.027	0
Total		98.188	96.533	97.105	97.126	97.926		95.039	96.316	97.332	98.012	98.364
O		23	23	23	23	23		23	23	23	23	23
Si		7.04621	6.92556	6.87426	6.92749	6.92729		6.07307	6.13342	6.57034	6.55302	6.71379
Ti		0.0150666	0.02336	0.0317764	0.025753	0.029912		0.0258244	0.026171	0.0451691	0.0432762	0.0454114
AlIV		0.953786	1.07444	1.12574	1.07251	1.07271		1.92693	1.86658	1.42966	1.44698	1.28621
AlVI		0.94224	0.96591	0.997213	1.07182	0.966096		1.39996	1.44159	1.59415	1.54491	1.81634
Cr		0.00390336	0	0.00522589	0.00543646	0.00157766		0.00270285	0.0020894	0.00504626	0.00090982	0.00431892
Fe2+		1.11476	1.08876	1.20815	1.17607	1.22809		0.912628	0.919392	0.874896	0.874429	0.822657
Mn		0.00430113	0.00414049	0.00377289	0	0.00519115		0	0.00485057	0.00516114	0.00609278	0.00377514
Ni		0.00255381	0	0.00436675	0.00153647	0		0	0.00129907	0.000116683	0.00312407	0
Mg		3.13427	3.11711	2.91602	2.79202	2.8993		2.76765	2.72504	2.60176	2.64151	2.43008
CaM4		1.10994	1.09067	1.20225	1.25829	1.24417		1.69759	1.66046	1.39835	1.38706	1.38905
NaM4		0.640333	0.65638	0.573748	0.630627	0.582317		0.219473	0.245278	0.594408	0.592563	0.469233
NaA		0.613884	0.718189	0.62671	0.571999	0.627527		0.799511	0.779759	0.645261	0.675717	0.812807
KA		0.00395893	0	0.00678248	0.00237576	0		0.174664	0.19407	0.000181546	0.00487174	0.141782
NiC		0.0351769	0.053667	0.0618418	0.0399881	0.0433414		0.10924	0.121165	0.0826541	0.0864719	0.0870616
XMg		0.737643	0.741133	0.707056	0.703618	0.702454		0.752022	0.747727	0.748352	0.751295	0.747088
(Na+K)A		0.617843	0.718189	0.633492	0.574375	0.627527		0.974176	0.973829	0.645442	0.680589	0.954589
		XMg = Mg/(Mg + Fe2+ ).

## Sheet: Table S5
Table S5 The P-T conditions of the symplectite after omphacite calculated by Cpx-Opx solvus thermobarometers.
Number		(Cpx-Opx)1			(Cpx-Opx)2			(Cpx-Opx)3			(Cpx-Opx)4			(Cpx-Opx)5
Calculated P/kbar		BK-90/°C	T-98/°C		BK-90/°C	T-98/°C		BK-90/°C	T-98/°C		BK-90/°C	T-98/°C		BK-90/°C	T-98/°C
5		771.966	800.364		783.809	815.018		806.963	848.953		774.721	762.56		779.228	805.615
6		774.796	803.261		786.668	817.954		809.938	851.981		777.342	765.355		782.011	808.526
7		777.626	806.158		789.528	820.891		812.914	855.009		779.963	768.15		784.794	811.437
8		780.455	809.055		792.388	823.827		815.889	858.037		782.585	770.944		787.577	814.348
9		783.285	811.951		795.247	826.763		818.864	861.065		785.206	773.739		790.36	817.259
10		786.115	814.848		798.107	829.7		821.839	864.093		787.827	776.534		793.143	820.17
12		791.775	820.642		803.826	835.572		827.79	870.149		793.07	782.124		798.709	825.992
15		800.264	829.332		812.405	844.381		836.715	879.232		800.934	790.508		807.059	834.725
		BK-90 = Brey and Köhler (1990)
		T-98 = Taylor (1998)
